# Supplementary material
Source: publisher site journal article supplement (https://www.degruyter.com/publication/journal_key/FREQ/downloadAsset/FREQ_Instructions%20for%20Authors.pdf)
Supplement: Supplementary file 1 [file FREQ_Instructions%20for%20Authors.pdf]

## Instructions for Authors

Submitting an article ... is done online at <http://mc.manuscriptcentral.com/frequenz>.

Contributions submitted to this journal must be written in clear and concise English. Only unpublished material can be accepted, and authors may not republish their paper in the same or similar form. The decision on the acceptance is taken after a peer-reviewing procedure. The journal makes no page charges.

The authors can provide the names and e-mail addresses of up to four potential reviewers.

### Each article

... must begin with an abstract of less than 150 words. The abstract should be followed by an appropriate classification according to *IEEE* and a list of 3 to 6 index terms/keywords. The short title for the running head should contain at most 80 characters, spaces inclusive. Please use only *SI units* in the text.

**Figures** must be of sufficiently high resolution (minimum 600 dpi). Authors are encouraged to submit illustrations in color if necessary for their scientific content. Publication of color figures is provided free of charge both in online and print editions.

**References** should be numbered consecutively in the order in which they appear in the text. In the text body, references should be identified by Arabic numerals surrounded by square brackets. All references should be collected in the reference section at the end of the paper. Please use abbreviations for titles of journals in accordance with those listed in the "World List of Scientific Periodicals" (Butterworth London).

Authors using **LaTeX** are asked to follow a few basic guidelines while formatting their paper for publication, in order for the journal to be as homogeneous in appearance as possible, and to be as flexible as possible with regards to all macro packages. Templates are available [here](#).

Authors using **Word** are requested to prepare their manuscript due to the following guidelines:

- (1) Make use of Word templates/styles to help insure consistency in your manuscript! It doesn't matter which kind of templates you use – as long as you avoid formatting by hand. E.g., you could use the style "Heading 1" for section headings rather than choosing the font, color, paragraph spacing etc. individually.
- (2) May also define your own styles. E.g., to typewrite the variable  $x$  within the text, you

ensure that the formatting attribute italic remains after the publisher's conversion and final typesetting.

(3) Use the Equation Editor for both in line and displayed formulas. See (2) for exceptions.

(4) Settings for the paper, margins, fonts etc. can be chosen arbitrarily. Final formatting is however made by the Publisher. So please keep formatting macros to a minimum to make conversion of files more accurate. Do not worry about chapter headings, running titles, bad page breaks etc., and avoid adding extra space and using glue to improve the appearance of the manuscript.

---

### **Galley proofs**

... will be sent to all authors in due time with a request to carefully check them.

### **After publication**

... each author will receive a PDF file of the final version for private use only.
